# Supplementary material for: Dimer‐specific immunoprecipitation of active caspase‐2 identifies TRAF proteins as novel activators
Source: PubMed Central journal article supplement (PMC6043850; doi:10.15252/embj.201797072), 2018-06-06
Supplement: EMBJ-37-e97072-s001.pdf [file EMBJ-37-e97072-s001.pdf]

## Expanded View Figures

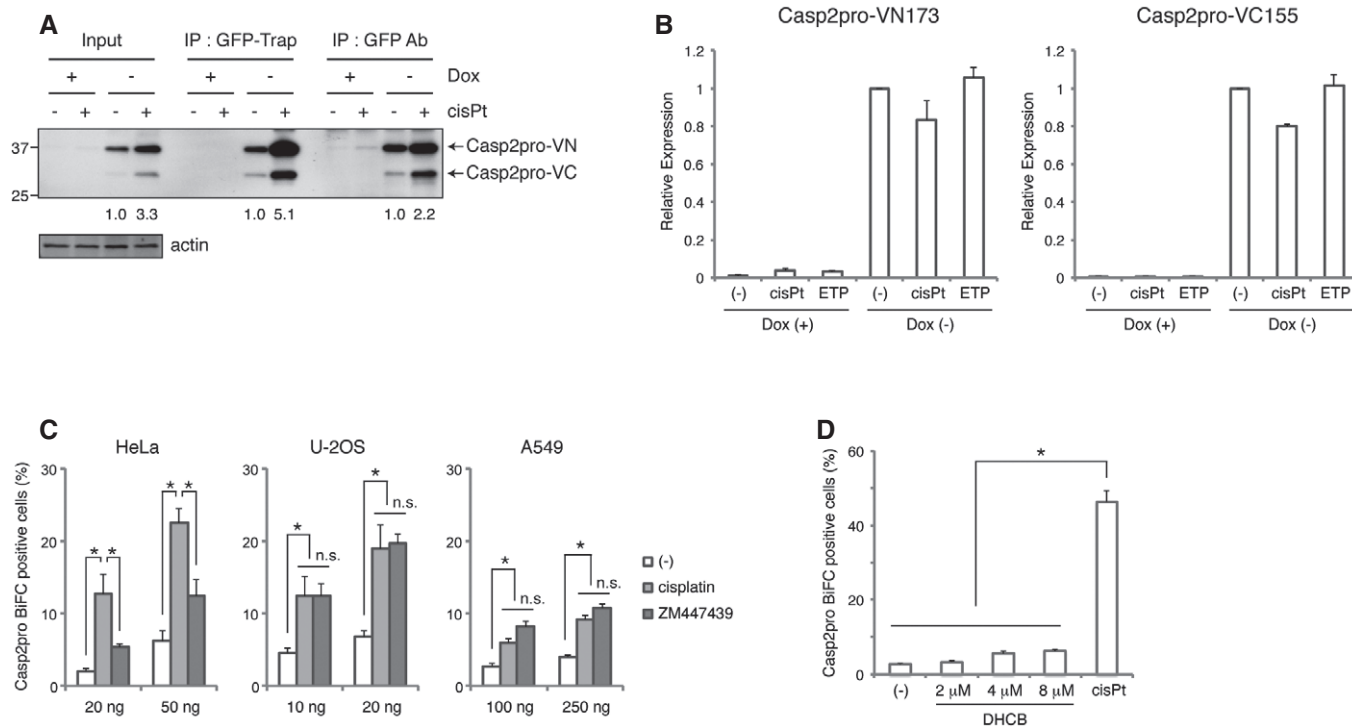

**Figure EV1. GFP-Trap precipitates BiFC dimers more efficiently and with less background compared to conventional immunoprecipitation, and cisplatin is a direct inducer of caspase-2 dimerization.**

- A Comparison of Casp2pro BiFC dimer immunoprecipitation with GFP-Trap and conventional immunoprecipitation with anti-GFP antibody. Casp2pro BiFC cells were treated with 20  $\mu$ M cisplatin in the presence of 10  $\mu$ M Q-VD(OMe)-OPh for 24 h. Relative band intensities of Casp2pro-VN were quantified, and ratio was indicated (values were normalized to the relevant mock treatment). Molecular weight markers are indicated in kDa.
- B mRNA expression of Casp2pro-VN173 and Casp2pro-VC155 was analyzed by qPCR after treatment of Casp2pro BiFC cells with mock, 20  $\mu$ M cisplatin, or 50  $\mu$ M etoposide in the presence of 10  $\mu$ M Q-VD(OMe)-OPh for 24 h.  $n = 3$  independent experiments (means + s.e.m.).
- C Indicated amount of Casp2pro BiFC constructs was transfected into HeLa, U-2OS, or A549 cells and allowed to express for 24 h. Cells were then treated with 20  $\mu$ M cisplatin or 2  $\mu$ M ZM447439 in the presence of 10  $\mu$ M Q-VD(OMe)-OPh for 24 h, and BiFC was detected by flow cytometry.  $n = 5$  (HeLa),  $n = 3$  (U-2OS), or  $n = 4$  (A549) independent experiments (means + s.e.m.). \* $P < 0.05$  (HeLa, U-2OS),  $P < 0.01$  (A549) by unpaired two-tailed  $t$ -test. n.s.; not significant.
- D Casp2pro BiFC cells were treated with the indicated concentrations of dihydrocytochalasin B (DHCb) or 20  $\mu$ M cisplatin in the presence of 10  $\mu$ M Q-VD(OMe)-OPh for 24 h. BiFC was detected by flow cytometry.  $n = 4$  independent experiments (means + s.e.m.).  $P < 0.005$  by unpaired two-tailed  $t$ -test.

Source data are available online for this figure.

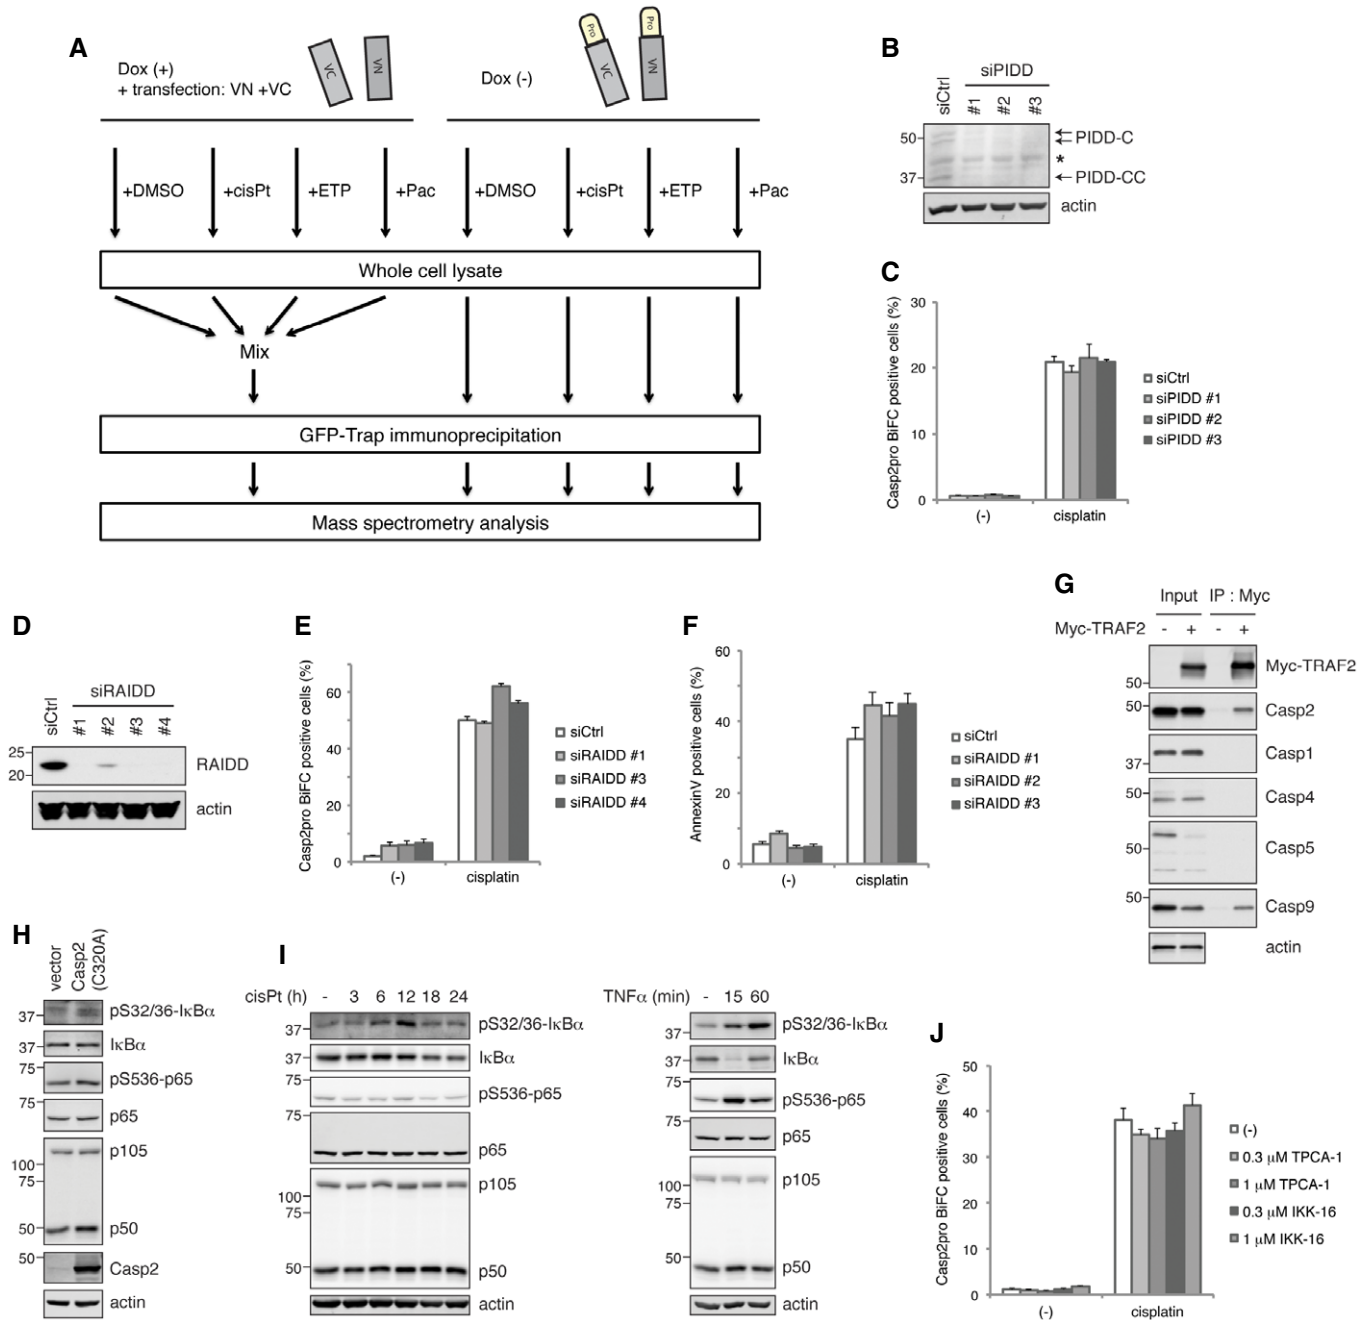

Figure EV2.

**Figure EV2. Workflow of mass spectrometry analysis. Cisplatin induces caspase-2 dimerization independently of either the PIDDosome or the NF- $\kappa$ B pathway.**

- A Workflow for mass spectrometry analysis. Casp2pro BiFC cells were treated with mock (DMSO), 20  $\mu$ M cisplatin, 50  $\mu$ M etoposide, or 100 nM paclitaxel in the presence of 10  $\mu$ M Q-VD(OMe)-OPh for 24 h followed by GFP-Trap immunoprecipitation. Note the control: Casp2pro BiFC expression was prevented with 1  $\mu$ g/ml doxycycline, and unconjugated BiFC constructs (VN and VC) were co-transfected into cells before treatment, similar to experimental samples. Control lysates were then pooled before GFP-Trap IP. GFP-Trap beads were subjected to on-bead protein digestion and analyzed by mass spectrometry.
- B, C Casp2pro BiFC cells were transfected with siRNA targeting PIDD for 48 h, and knockdown efficiency was confirmed by IB (B). PIDD siRNA transfected cells were treated with 20  $\mu$ M cisplatin in the presence of 10  $\mu$ M Q-VD(OMe)-OPh for 24 h. Caspase-2 BiFC was assessed by flow cytometry.  $n = 3$  independent experiments (means + s.e.m.) (C).
- D, E Casp2pro BiFC cells were transfected with siRNA targeting RAIDD for 48 h, and knockdown efficiency was confirmed by IB (D). RAIDD siRNA transfected cells were treated with 20  $\mu$ M cisplatin in the presence of 10  $\mu$ M Q-VD(OMe)-OPh for 24 h. Caspase-2 BiFC was assessed by flow cytometry.  $n = 3$  independent experiments (means + s.e.m.) (E).
- F HeLa cells were transfected with RAIDD siRNA for 48 h and then treated with 20  $\mu$ M cisplatin for 24 h. Apoptosis was assessed by annexin V staining and flow cytometry.  $n = 3$  independent experiments (means + s.e.m.).
- G HeLa cells were transfected with Myc-TRAF2 construct and cultured 48 h for expression. Cell lysates were prepared, followed by Myc-Trap immunoprecipitation and IB for indicated caspases.
- H HeLa cells were transfected with caspase-2(C320A) construct and cultured 48 h for expression. Cell lysates were prepared, followed by IB.
- I HeLa cells were treated with 20  $\mu$ M cisplatin in the presence of 10  $\mu$ M Q-VD(OMe)-OPh (left) or treated with 20 ng/ml TNF $\alpha$  (right) for indicated periods. Cell lysates were prepared and analyzed by IB.
- J Casp2pro BiFC cells were treated with 20  $\mu$ M cisplatin in the presence of 10  $\mu$ M Q-VD(OMe)-OPh with or without indicated NF- $\kappa$ B pathway inhibitors, TPCA-1 or IKK-16, at indicated concentrations for 24 h. Caspase-2 BiFC was assessed by flow cytometry.  $n = 3$  independent experiments (means + s.e.m.).

Source data are available online for this figure.

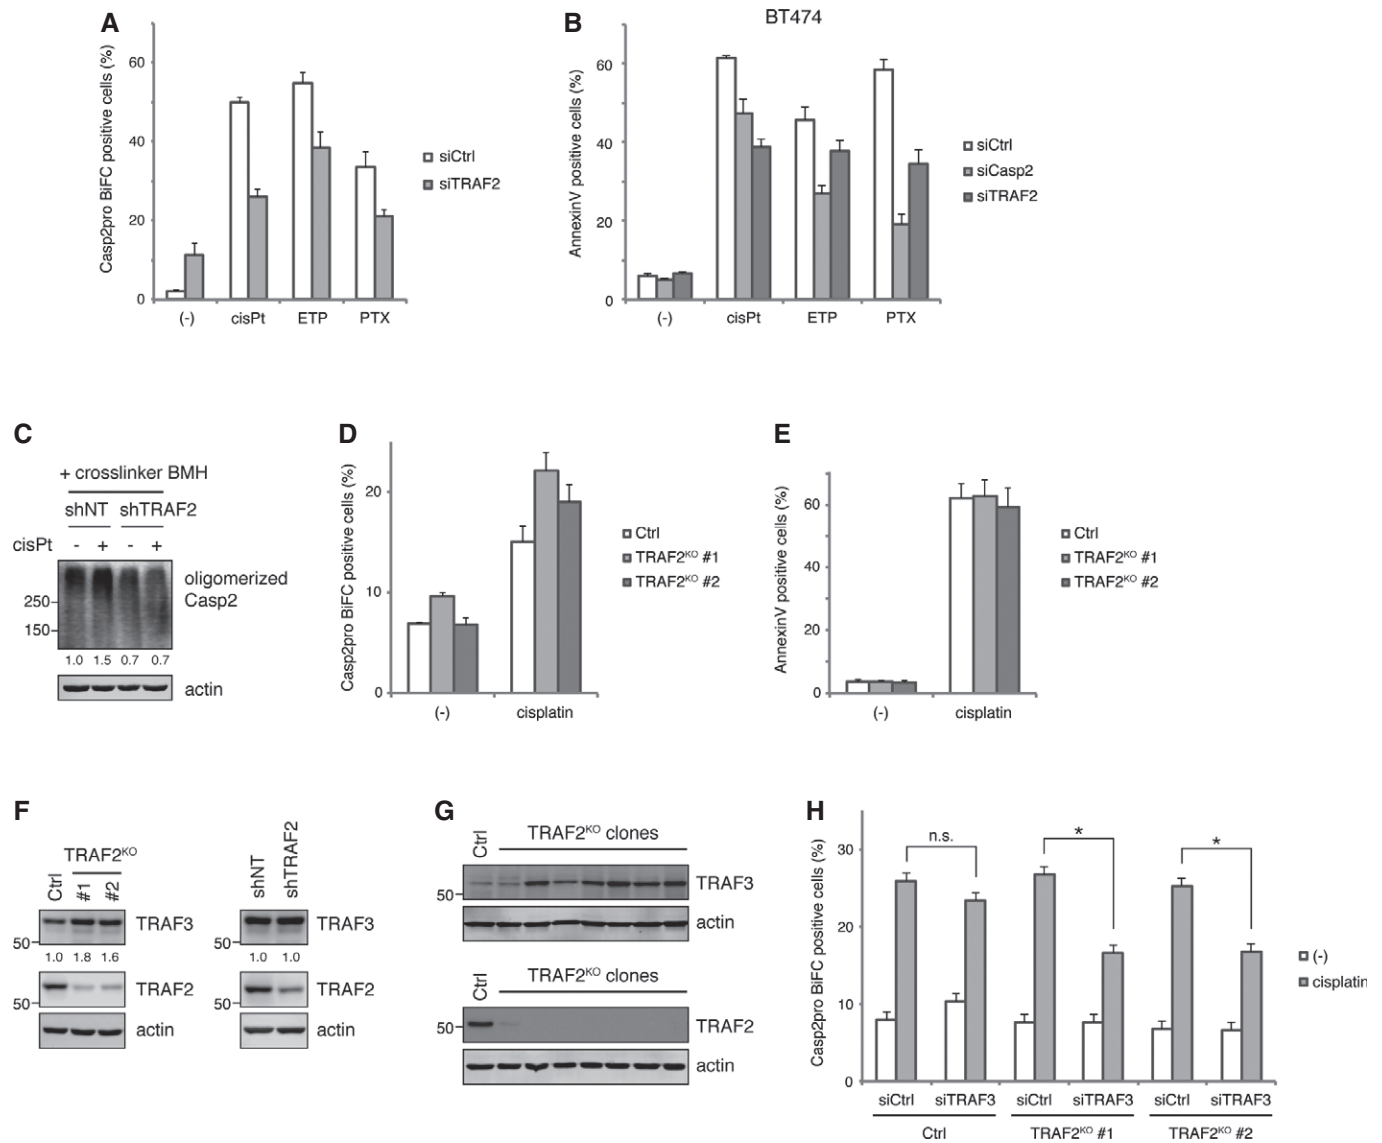

**Figure EV3. TRAF2 acts as a significant regulator of caspase-2 activation across multiple scenarios, while its genetic ablation leads to compensation from TRAF3.**

- A Casp2pro BiFC cells were transfected with TRAF2 siRNA for 48 h and then treated with 20  $\mu$ M cisplatin, 50  $\mu$ M etoposide, or 100 nM paclitaxel in the presence of 10  $\mu$ M Q-VD(OMe)-OPH for 24 h. Caspase-2 dimerization was assessed by flow cytometry.  $n = 3$  independent experiments (means + s.e.m.).
- B Caspase-2 or TRAF2 was knocked down by siRNA in BT474 breast cancer cells for 48 h, followed by treatment with 40  $\mu$ M cisplatin, 100  $\mu$ M etoposide, or 100 nM paclitaxel for 72 h. Apoptosis was assessed by annexin V staining and flow cytometry.  $n = 4$  independent experiments (means + s.e.m.).
- C shNT or shTRAF2 #1 HeLa cells were treated with 20  $\mu$ M cisplatin in the presence of 10  $\mu$ M Q-VD(OMe)-OPH for 24 h. Cells were collected and incubated with BMH for protein crosslinking, and then, lysates were prepared and oligomerized caspase-2 was detected by IB. Relative signal intensity of oligomerized caspase-2 was quantified and indicated below each lane (signal was normalized to mock treatment of shNT).
- D TRAF2 CRISPR-KO HeLa cells were transfected with 50 ng pair of Casp2pro BiFC constructs and cultured for 24 h. Cells were treated with 20  $\mu$ M cisplatin in the presence of 10  $\mu$ M Q-VD(OMe)-OPH for 24 h, and caspase-2 BiFC was assessed by flow cytometry.  $n = 4$  independent experiments (means + s.e.m.).
- E TRAF2 CRISPR-KO HeLa cells were treated with 20  $\mu$ M cisplatin for 24 h. Apoptosis was assessed by annexin V staining and flow cytometry.  $n = 3$  independent experiments (means + s.e.m.).
- F Lysates of TRAF2 CRISPR-KO HeLa (left) or shTRAF2 #1 HeLa cells (right) were prepared, followed by IB. Relative band intensity of TRAF3 was quantified and indicated below each lane [signal was normalized to control (left) or shNT (right)].
- G Lysates of several clones of TRAF2 CRISPR-KO HeLa cells were prepared, followed by IB.
- H Control or TRAF2 CRISPR-KO HeLa cells were transfected with TRAF3 siRNA, followed by Casp2pro BiFC construct transfection. Cells were treated with 20  $\mu$ M cisplatin in the presence of 10  $\mu$ M Q-VD(OMe)-OPH for 24 h. Caspase-2 BiFC was assessed by flow cytometry.  $n = 4$  independent experiments (means + s.e.m.). \* $P < 0.01$  (TRAF2<sup>KO</sup> #1),  $P < 0.05$  (TRAF2<sup>KO</sup> #2) by unpaired two-tailed  $t$ -test. n.s.; not significant.

Source data are available online for this figure.

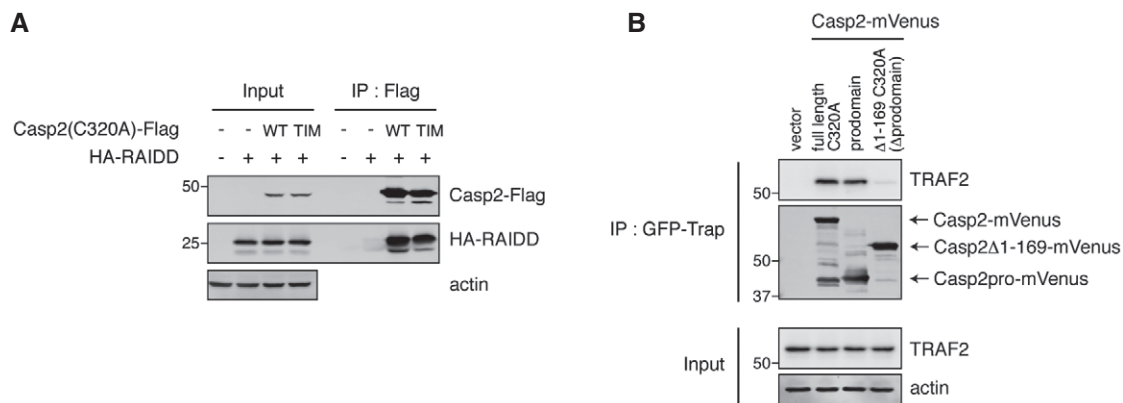

**Figure EV4. Mutation of the TRAF-interacting motif of caspase-2 does not disrupt RAIDD binding, while the caspase-2 prodomain is also important for binding TRAF2.**

A HEK293T cells were co-transfected with indicated caspase-2(C320A)-Flag (wild type or TIM mutant) and HA-RAIDD constructs. After 48-h culture for expression, lysates were prepared, followed by anti-Flag IP and IB.

B HEK293T cells were transfected with siRNA targeting caspase-2 3'-UTR to deplete endogenous caspase-2. 24 h post-siRNA transfection, cells were then transfected with indicated Casp2-mVenus constructs (full-length C320A, prodomain, or  $\Delta$ 1-169 C320A ( $\Delta$ prodomain)). Casp2-mVenus variants were immunoprecipitated by GFP-Trap, followed by IB for co-immunoprecipitated TRAF2.

Source data are available online for this figure.

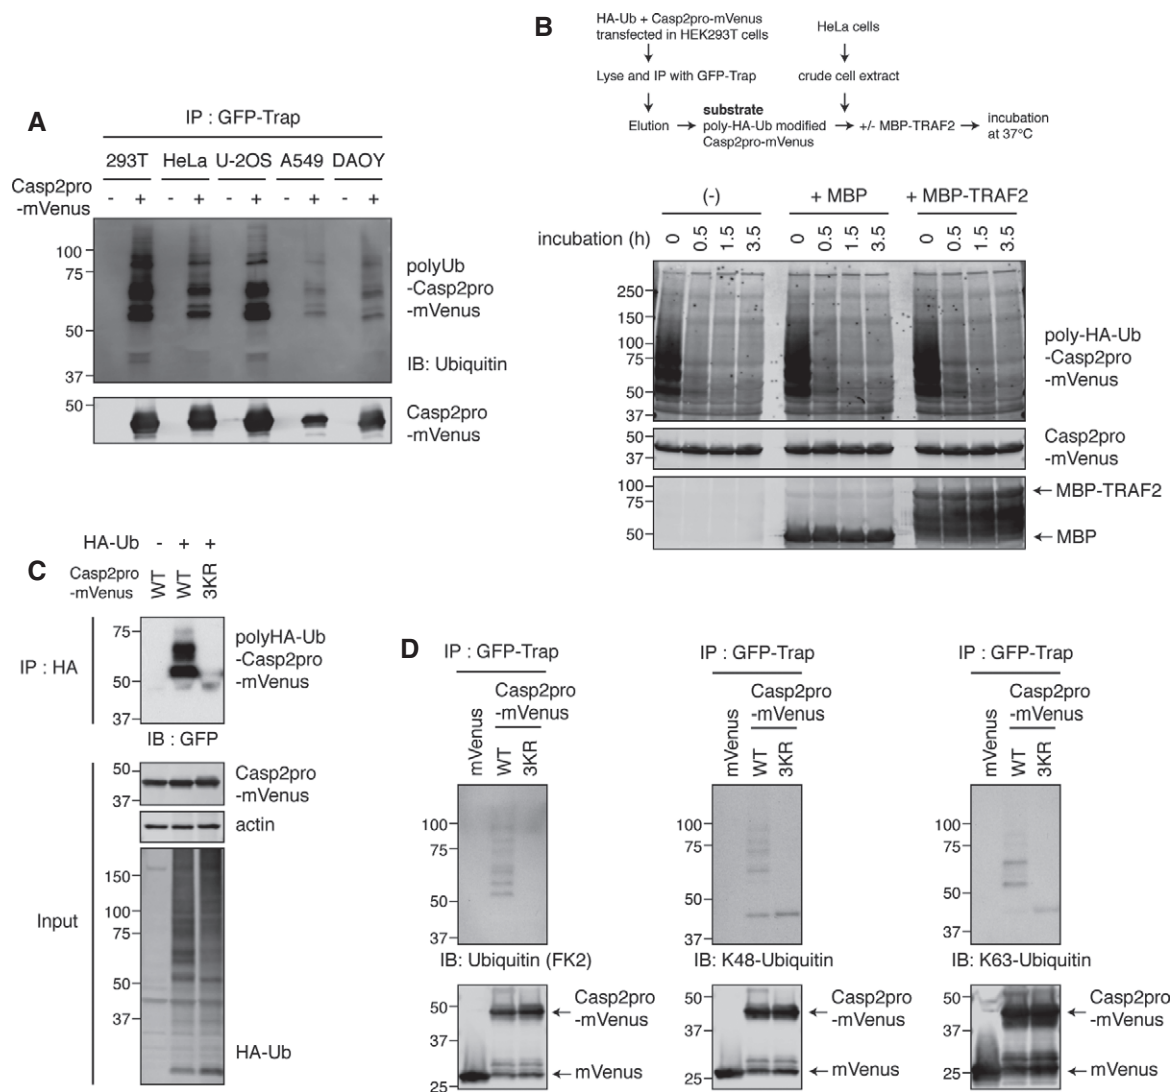

**Figure EV5. TRAF2 does not regulate removal of caspase-2 ubiquitin modifications, which consist of both K48- and K63-linked chains.**

A HEK293T, HeLa, U-2OS, A549, or DAOY cells were transfected with Casp2pro-mVenus construct and cultured 48 h for expression. Casp2pro-mVenus was immunoprecipitated by GFP-Trap and blotted with anti-ubiquitin antibody to detect ubiquitylated Casp2pro-mVenus.

B *In vitro* deubiquitylation assay of caspase-2. Casp2pro-mVenus was ubiquitylated with HA-ubiquitin in HEK293T cells and purified by GFP-Trap IP and elution. Then, poly-HA-ubiquitin-modified Casp2pro-mVenus was added to HeLa cell lysate with or without recombinant MBP-TRAF2 or MBP control protein. The mixture was incubated at 37°C for indicated periods and analyzed by immunoblot to assess whether TRAF2 could oppose caspase-2 deubiquitylation.

C HA-ubiquitin and Casp2pro-mVenus (wild type or 3KR mutant) were co-transfected into HEK293T cells, and lysates were immunoprecipitated by anti-HA affinity beads and analyzed by IB.

D HEK293T cells were transfected with Casp2pro-mVenus, wild type or 3KR mutant, followed by ubiquitylated Casp2pro-mVenus purification as in (A). IB was carried out with anti-ubiquitylated protein antibody (FK2), K48-linkage-specific, or K63-linkage-specific anti-ubiquitin antibody.

Source data are available online for this figure.

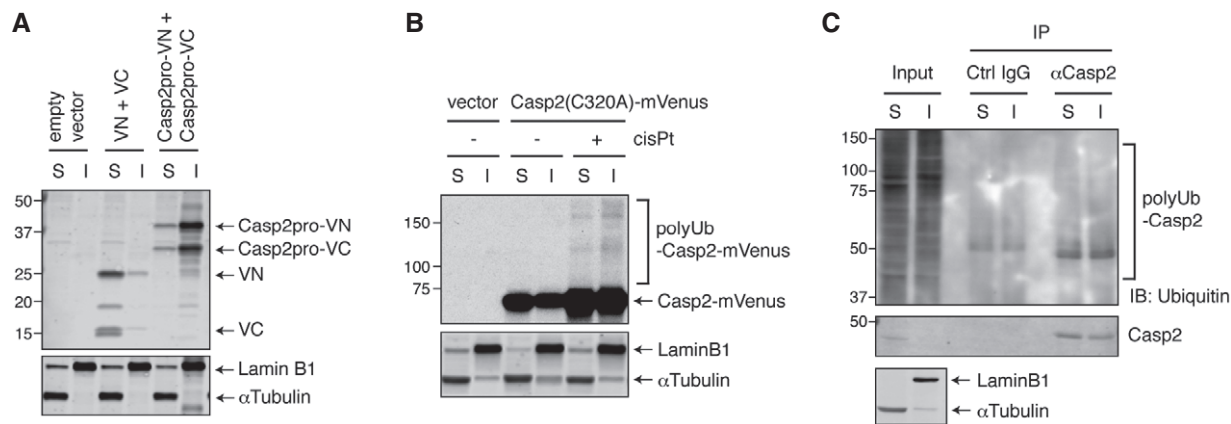

**Figure EV6. Cisplatin promotes accumulation of ubiquitylated caspase-2 in the detergent-insoluble fraction.**

- A Caspase-2 shifts BiFC dimer localization to an insoluble fraction. Pairs of unconjugated BiFC fragments or Casp2pro BiFC fragments were overexpressed in HEK293T cells for 24 h to induce dimerization, after which cells were biochemically fractionated (S: soluble, I: insoluble fraction) and assessed by IB.
- B HeLa cells were transfected with Casp2(C320A)-mVenus construct and allowed to express for 24 h and then treated with or without 20  $\mu$ M cisplatin in the presence of 10  $\mu$ M Q-VD(OMe)-OPh for 24 h. Cells were biochemically fractionated and assessed by IB.
- C HeLa cells were treated with 20  $\mu$ M cisplatin in the presence of 10  $\mu$ M Q-VD(OMe)-OPh for 24 h and then biochemically fractionated. Lysates were immunoprecipitated in denaturing/renaturing conditions with anti-caspase-2 antibody or control IgG, followed by IB.

Source data are available online for this figure.

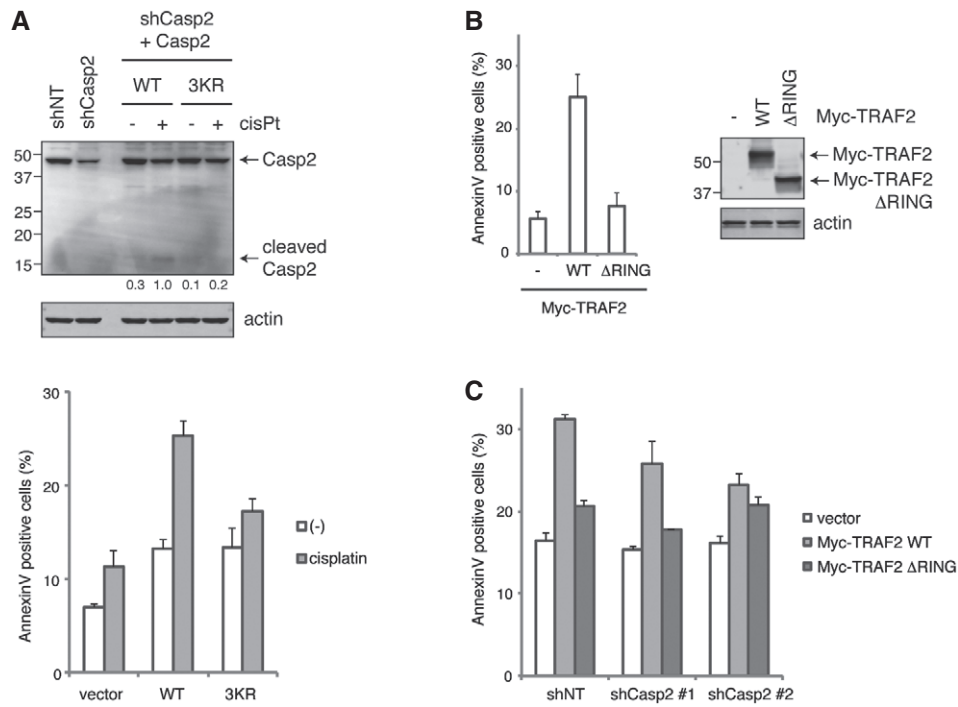

**Figure EV7. TRAF2 overexpression-induced cell death requires both the RING domain and caspase-2.**

- A shCasp2 #1 cells were transfected with indicated caspase-2 construct (wild type or 3KR mutant) containing shCasp2-resistant sequence. Cells were treated with 10  $\mu$ M cisplatin for 24 h, followed by IB. Relative band intensity of cleaved caspase-2 was quantified and indicated below each lane (signal was normalized to cisplatin treatment of WT) (top). Transfected cells were treated with 5  $\mu$ M cisplatin for 24 h, and then analyzed by annexin V staining and flow cytometry.  $n = 4$  independent experiments (means + s.e.m.) (bottom).
- B HeLa cells were transfected with indicated Myc-TRAF2 construct (wild type or RING domain mutant) for 48 h. Apoptosis was analyzed by annexin V staining and flow cytometry.  $n = 3$  independent experiments (means + s.e.m.) (left). Expression of Myc-TRAF2 was confirmed by IB (right).
- C HeLa shNT, shCasp2 #1, or shCasp2 #2 cells were transfected as in (B), and apoptosis was analyzed by annexin V staining and flow cytometry.  $n = 3$  independent experiments (means + s.e.m.).

Source data are available online for this figure.
