# Supplementary material for: Dimer‐specific immunoprecipitation of active caspase‐2 identifies TRAF proteins as novel activators
Source: PubMed Central journal article supplement (PMC6043850; doi:10.15252/embj.201797072), 2018-06-06

**Figure 3**

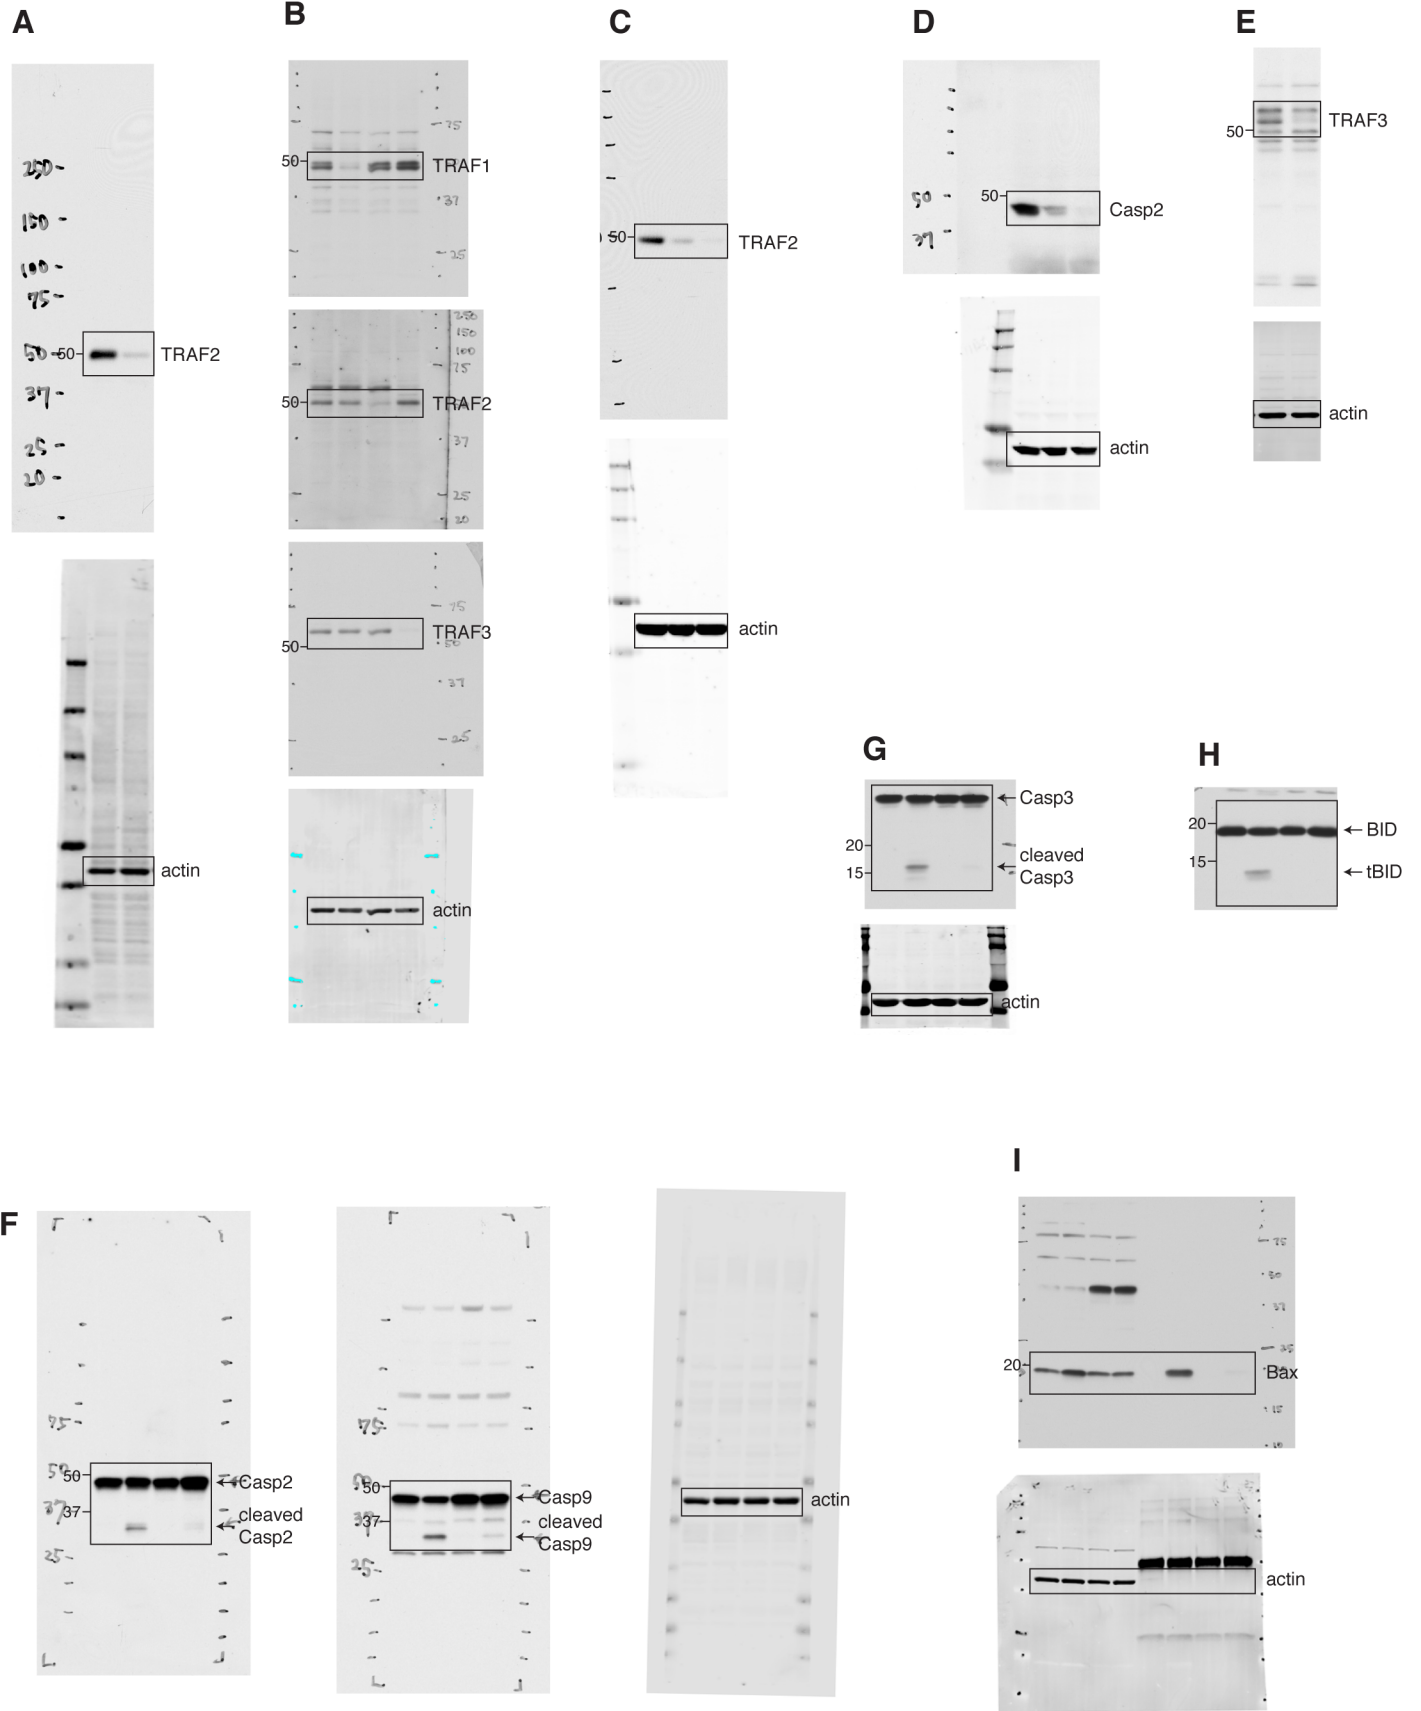

Supplement: EMBJ-37-e97072-s004.pdf [file EMBJ-37-e97072-s004.pdf]
